# Supplementary material for: Identification of Biomarkers Based on Differentially Expressed Genes in Papillary Thyroid Carcinoma
Source: PubMed Central journal article supplement (PMC6028435; doi:10.1038/s41598-018-28299-9), 2018-07-02
Supplement: 41598_2018_28299_MOESM1_ESM.pdf [file 41598_2018_28299_MOESM1_ESM.pdf]

# Identification of Biomarkers Based on Differentially Expressed Genes in Papillary Thyroid Carcinoma

Jun Han<sup>1#</sup>, Meijun Chen<sup>1#</sup>, Yihan Wang<sup>2</sup>, Boxuan Gong<sup>3</sup>, Tianwei Zhuang<sup>4</sup>,  
Lingyu Liang<sup>5</sup>, Hong Qiao<sup>1\*</sup>

<sup>1</sup>Department of Endocrinology and Metabolism, The Second Affiliated Hospital, Harbin Medical University, Harbin, 150001, China

<sup>2</sup>College of Bioinformatics Science and Technology, Harbin Medical University, Harbin, 150081, China

<sup>3</sup>Faculty of Vehicle Engineering and Mechanics, Dalian University of Technology, Dalian, 116024, China

<sup>4</sup>Department of Endocrinology and Metabolism, Mu danjiang Medical University Affiliated Hongqi Hospital, Mu danjiang, 157000, China

<sup>5</sup>Internal medicine, Hebei Provincial Eye Hospital, Xingtai, Hebei, 054001, China

#These authors have contributed equally to this work

\*To whom correspondence should be addressed. Tel/Fax: 08686297720; Email: qiaoh0823@sina.com

## Supplementary Table

**Supplementary Table S1: The top 10% nodes in the network**

| Degree | Pathway name                                                                                                                                                                        | Gene symbol       |
|--------|-------------------------------------------------------------------------------------------------------------------------------------------------------------------------------------|-------------------|
| 24     | Focal adhesion; Adherens junction;<br>Natural killer cell mediated<br>cytotoxicity; Regulation of actin<br>cytoskeleton;<br>B cell receptor signaling pathway;<br>Viral myocarditis | RAC1, RAC2*, RAC3 |
| 18     | Focal adhesion; Adherens junction;<br>Pathways in cancer; Thyroid cancer;                                                                                                           | CTNNB1#           |

|    |                                                                                                                                                               |                                                                                                                                                                                                                |
|----|---------------------------------------------------------------------------------------------------------------------------------------------------------------|----------------------------------------------------------------------------------------------------------------------------------------------------------------------------------------------------------------|
|    | Arrhythmogenic right ventricular cardiomyopathy                                                                                                               |                                                                                                                                                                                                                |
| 14 | Chemokine signaling pathway; Natural killer cell mediated cytotoxicity; B cell receptor signaling pathway; Pathways in cancer; Thyroid cancer; Bladder cancer | HRAS <sup>#</sup> , KRAS, NRAS                                                                                                                                                                                 |
| 13 | ECM-receptor interaction                                                                                                                                      | FN1 <sup>#</sup>                                                                                                                                                                                               |
| 13 | Pathways in cancer; Bladder cancer; Bladder cancer; Small cell lung cancer; Thyroid cancer                                                                    | CCND1 <sup>#</sup>                                                                                                                                                                                             |
| 13 | Complement and coagulation cascades; Systemic lupus erythematosus                                                                                             | C3 <sup>#</sup>                                                                                                                                                                                                |
| 13 | ECM-receptor interaction                                                                                                                                      | LAMC3, LAMB4, LAMA1, LAMA2, LAMA3, LAMA4, LAMA5 <sup>#</sup> , LAMB1 <sup>#</sup> , LAMB2, LAMB3 <sup>#</sup> , LAMC1, LAMC2                                                                                   |
| 12 | ECM-receptor interaction                                                                                                                                      | COL1A1 <sup>#</sup> , COL1A2, COL2A1, COL3A1 <sup>#</sup> , COL4A1, COL4A2, COL4A3, COL4A4, COL4A5, COL4A6, COL5A1, COL5A2, COL6A1, COL6A2, COL6A3, COL11A1, COL11A2, COL6A6, COL24A1, COL6A5, COL5A3, COL27A1 |
| 12 | Notch signaling pathway                                                                                                                                       | NOTCH1, NOTCH2, NOTCH3, NOTCH4 <sup>#</sup>                                                                                                                                                                    |

|    |                                                                                     |                                                                                                                     |
|----|-------------------------------------------------------------------------------------|---------------------------------------------------------------------------------------------------------------------|
| 11 | Focal adhesion                                                                      | ITGB1, ITGB3, ITGB4 <sup>#</sup> , ITGB5,<br>ITGB6, ITGB7, ITGB8                                                    |
| 10 | Focal adhesion;<br>Chemokine signaling pathway;<br>Regulation of actin cytoskeleton | PXN <sup>#</sup>                                                                                                    |
| 8  | ECM-receptor interaction                                                            | COMP <sup>#</sup> , THBS1, THB2, THBS3,<br>THBS4                                                                    |
| 8  | p53 signaling pathway; Thyroid<br>cancer; Pathways in cancer; Bladder<br>cancer     | CDKN1A <sup>#</sup>                                                                                                 |
| 7  | Focal adhesion                                                                      | ITGA11, ITGA6, ITGA1, ITGA2,<br>ITGA2B, ITGA3 <sup>#</sup> , ITGA4,<br>ITGA5, ITGA7, ITGA9, ITGAV,<br>ITGA10, ITGA8 |
| 7  | Natural killer cell mediated<br>cytotoxicity                                        | ZAP70*                                                                                                              |
| 6  | Chemokine signaling pathway                                                         | RAC1, RAC2*                                                                                                         |
| 6  | Cytokine-cytokine receptor<br>interaction                                           | IL2RG*                                                                                                              |
| 6  | Natural killer cell mediated<br>cytotoxicity                                        | CD247*                                                                                                              |

---

<sup>#</sup>: Up-regulated genes; \*: Down-regulated genes
